# Supplementary material
Source: PubMed Central journal article supplement (PMC2615811)
Supplement: NIHMS84897-supplement-01.pdf [file NIHMS84897-supplement-01.pdf]

## Supplemental Data

### ATP Consumption

#### by Mammalian Rod Photoreceptors

#### in Darkness and in Light

Haruhisa Okawa, Alapakkam P. Sampath, Simon B. Laughlin, and Gordon L. Fain

#### Supplemental Experimental Procedures

#### Calculation of ATP Consumption Resulting from Na<sup>+</sup> Influx Through cGMP-gated Channels of Outer Segment

The total flux as current into the rod outer segment is the sum of the current passing through the channels and the current carried by the exchanger [1],

$$i_T = i_{Ch} + i_{Ex} \quad (1)$$

Accordingly, the part of this current carried by Na<sup>+</sup> is the sum of the current carried by Na<sup>+</sup> through the channels plus the current carried by Na<sup>+</sup> through the exchanger,

$$i_{Na(T)} = i_{Na(Ch)} + i_{Na(Ex)} \quad (2)$$

We calculate the Na<sup>+</sup> current carried through the channels first. It is approximately equal to the total current minus the exchange current minus the fraction of the inward current through the channels carried by Ca<sup>2+</sup>,

$$i_{Na(Ch)} = i_T - i_{Ex} - i_{Ca(Ch)} \quad (3)$$

Since the value of the Ca<sup>2+</sup> current entering the rod at steady state is equal to twice the exchange current [2], we have

$$i_{Na(Ch)} = i_T - 3i_{Ex} \quad (4)$$

Since 4 sodium ions are transported inward by the exchange transporter for each net charge transported inward [3], the value of the  $Na^+$  flux as a current transported inward is four times the value of the exchange current,

$$i_{Na(Ex)} = 4i_{Ex} \quad (5)$$

The total current carried by  $Na^+$  is therefore given by

$$i_{Na(T)} = i_T - 3i_{Ex} + 4i_{Ex} = i_T + i_{Ex} \quad (6)$$

To use this equation for a mouse rod, we must first estimate the value of the exchange current as a fraction of the total current. We did this (M. L. Woodruff and G. L. Fain, unpublished) by fitting the exchange current from the averaged mouse rod response to saturating illumination to an equation of the form

$$i_T = i_{Ch} + i_{Ex}[1 - \exp(-t / \tau)] \quad (7)$$

were  $i_T$  is the total photocurrent,  $i_{Ch}$  the current due to the cyclic nucleotide-gated channels,  $i_{Ex}$  the current due to  $Na^+/Ca^{2+}$ - $K^+$  exchange, and  $\tau$  the time constant of  $Ca^{2+}$  removal from the outer segment. The best fitting values we obtained were as follows:  $i_{Ch} = 0.86$ ,  $i_{Ex} = 0.14$ , and  $\tau = 50.2$  ms. On the assumption that the channels close instantaneously,  $i_{Ex}$  can be extrapolated back to  $t = 0$  and can be estimated to represent approximately 14% of  $i_T$ . Since however the channels even in the brightest light take several milliseconds to close [4], this is likely to be an overestimate. If the current is extrapolated back to the time when half of the total current has been suppressed [as in 5, 6], the term  $i_{Ex} [1 + \exp(-t/\tau)]$  is 0.074, indicating that the exchange current may represent only about 7% of the total current. This value is similar to previous estimates from salamander [5] and guinea-pig rods [1] and is also close to the previous estimate

**Current Biology, Volume 18**

of 6% of total current for mouse rods of Makino et al. [7]. The total current carried by  $\text{Na}^+$  from Eqn. (6) would therefore be equal to  $1.07i_T$ .

This value is subject to a number of uncertainties. It ignores, for example, the current through the cyclic nucleotide-gated channels carried outward by  $\text{K}^+$ . We can estimate this current in the dark as a fraction of the  $\text{Na}^+$  current from the GHK current equations (see Eqns. (11) below) by taking the resting potential of the rod as  $-37.3$  mV, which is the mean value we have recorded from mouse rods and is similar to values previously recorded in primate rods [8] and amphibians [see for example 9]. We have taken the relative permeability of the channels of  $\text{K}^+$  to  $\text{Na}^+$  as 0.7 [see 10], the values for the external ion concentrations from the composition of the bathing medium as  $[\text{Na}]_o = 152$  mM and  $[\text{K}]_o = 2.5$  mM, and internal ion concentrations from values for other neurons and assumed to be  $[\text{Na}]_i = 30$  mM and  $[\text{K}]_i = 100$  mM. This gives a ratio of the  $\text{K}^+$  to  $\text{Na}^+$  current of 0.11, with the  $\text{K}^+$  current opposite in sign to the  $\text{Na}^+$  current. The  $\text{K}^+$  current would therefore cause us to underestimate the value of the  $\text{Na}^+$  flux from Eqn. (6) by about 10% in darkness, though the size of this error would decrease in the presence of a steady background light as the rod hyperpolarized away from the  $\text{Na}^+$  reversal potential and closer to that for  $\text{K}^+$ .

Our value of  $\text{Na}^+$  influx also ignores the inward current carried by  $\text{Mg}^{2+}$ . The fraction of the current carried by  $\text{Mg}^{2+}$  is unknown for a mouse rod but has been estimated as about one-third the value of the  $\text{Ca}^{2+}$  current in toad rods [5]. This  $\text{Mg}^{2+}$  current may therefore represent about 2-3% of the total current and would lead us to overestimate the part of the current carried by  $\text{Na}^+$  by approximately this percentage. Finally, in Fig. 1A we have estimated the ratio of the exchanger current to the ionic current only for the rod in darkness, and this ratio would change in

**Current Biology, Volume 18**

background light as a result of changes in  $\text{Na}^+$  and  $\text{Ca}^{2+}$  driving forces and the voltage

dependence of  $\text{Na}^+/\text{Ca}^{2+}\text{-K}^+$  transport. These effects are likely, however, to be small.

We have estimated the value of the normal resting dark current of a mouse rod as 25 pA.

Taking  $i_{\text{Na}(T)}$  as approximately  $1.1i_T$ , 25 pA is equivalent to the influx into the rod of about  $(1.1)(2.5 \times 10^{-11} \text{ coul s}^{-1})(1.6022 \times 10^{-19} \text{ coul per Na}^+)^{-1}$  or  $1.72 \times 10^8 \text{ Na}^+$  ions per second. Since 3  $\text{Na}^+$  are transported outward for every ATP utilized [11], the rod in darkness must consume approximately  $5.7 \times 10^7$  ATP per second in darkness to support the influx of  $\text{Na}^+$  ions. This can be converted into moles per liter from the dimensions of a mouse rod outer segment, which we took from the results of electron tomography of rapidly frozen isolated outer segments of Nickell et al. [12]. They report an outer segment length of 23.8  $\mu\text{m}$  and a diameter of 1.32  $\mu\text{m}$ . Their measurements show that the cytoplasm occupies only 31% of the space inside the outer segment, with the rest taken up by the disk membranes and intradiskal space. They therefore estimate the volume of the cytoplasm as about  $1 \times 10^{-14}$  liters. The influx of  $\text{Na}^+$  amounts then to about 30 mM  $\text{Na}^+$  per second, an enormous load of  $\text{Na}^+$  influx into the cell, and the rate of ATP turnover is equivalent to about 10 mM ATP per second.

**Calculation of Light Dependence of ATP Consumption by Guanylyl Cyclase**

The maximal rate of the cyclase occurs when the outer segment  $\text{Ca}^{2+}$  is minimal [see for example 13] and is approximately 1 nmole cGMP per retina per min at 30 °C [14] and therefore approximately 2 nmoles cGMP per retina per min at the body temperature of a mouse (38-39 °C), or  $2 \times 10^{13} \text{ cGMP s}^{-1}$ . Since there are  $6.5 \times 10^6$  rods per mouse retina [15], this is  $3 \times 10^6$  cGMP synthesized per rod per second. The minimum rate of synthesis is 0.1 of this value [16], or  $3 \times$

**Current Biology, Volume 18**

$10^5$  cGMP  $s^{-1}$ . Since 2 ATPs are required to regenerate the GTP from which cGMP is synthesized by guanylyl cyclase, the expenditure of ATP for cGMP synthesis would range from about  $6 \times 10^5$  ATP  $s^{-1}$  in darkness to  $6 \times 10^6$  ATP  $s^{-1}$  in bright light.

We have estimated the dependence of the cyclase on light intensity in the following way. We assumed that the free- $Ca^{2+}$  concentration in the rod outer segment is proportional to the outer segment current, as seems very likely from experiments on both salamander [17] and mouse [13]. The free- $Ca^{2+}$  concentration was then estimated from the equation

$$[Ca]_{free} = ([Ca]_{max} - [Ca]_{min})(1 - i_{step}) + [Ca]_{min} \quad (8)$$

where  $[Ca]_{free}$  is the free- $Ca^{2+}$  concentration in the outer segment,  $[Ca]_{max}$  and  $[Ca]_{min}$  are the maximum and minimum values of the free- $Ca^{2+}$  concentration, and  $i_{step}$  is the mean normalized photocurrent response of a mouse rod to steps of light from Woodruff et al. [18]. The values of  $[Ca]_{max}$  and  $[Ca]_{min}$  were taken from Woodruff et al. [13] as 240 nM in darkness and 46 nM in saturating light.

The cyclase activity could then be calculated at each light intensity from the free- $Ca^{2+}$  concentration and the equation

$$A = \frac{(A_{max} - A_{min})}{1 + ([Ca]_{free} / K_m)^n} + A_{min} \quad (9)$$

as given in Olshevskaya et al. [16], where  $A$  is the activity of the enzyme,  $A_{max}$  and  $A_{min}$  the maximum and minimum activities ( $3 \times 10^6$  cGMP  $s^{-1}$  and  $3 \times 10^5$  cGMP  $s^{-1}$ ),  $[Ca]_{free}$  the free- $Ca^{2+}$  concentration taken from Eqn. (8), and  $K_m$  and  $n$  constants equal to 70 nM and 2.2 [16]. The enzyme activities were then multiplied by 2 in order to calculate the ATP expenditure required to synthesize cGMP.

### Calculation of ATP Required for Extrusion of Na<sup>+</sup> Entering Inner Segment Through $i_h$

We estimated the Na<sup>+</sup> flux entering the rod through  $i_h$  in the following way. We first calculated  $i_h$  as a function of voltage from Eqn. (1) of Demontis et al. [19], which provides an empirical description of voltage-gated currents from guinea-pig rods. The component of their equation due to  $i_h$  is as follows:

$$i_h = \frac{G_h(V - E_h)}{1 + \exp\left(\frac{V - V_{1/2h}}{S_h}\right)} \quad (10)$$

where  $G_h$  is the maximum conductance (1 nS),  $V_{1/2h}$  the voltage for half activation (-75 mV), and  $S_h$  a constant equal to 8.2 mV. The numbers in parentheses are the mean values of the parameters averaged from 30 cells [19].  $E_h$ , the reversal potential for the current, was kept fixed at -31 mV as in Demontis et al.[19].

Once we calculated the total current due to  $i_h$ , we next used the ion permeability ratio of the conductance to calculate separately the Na<sup>+</sup> and K<sup>+</sup> current through the channels as a function of voltage from the GHK current equations,

$$I_{h(Na)} = P_{Na}V_m \frac{F^2}{RT} \frac{[Na^+]_o - [Na^+]_i e^{FV_m/RT}}{1 - e^{FV_m/RT}} \quad \text{and} \quad I_{h(K)} = P_KV_m \frac{F^2}{RT} \frac{[K^+]_o - [K^+]_i e^{FV_m/RT}}{1 - e^{FV_m/RT}} \quad (11)$$

We have taken  $[Na^+]_o = 140$  mM and  $[K^+]_o = 3.6$  mM from the composition of the external solution in Demontis et al. [19] and assumed that  $[Na^+]_i = 30$  mM and  $[K^+]_i = 100$  mM. This leaves the permeabilities as the only unknowns. Since however the ratio of permeabilities  $P_{Na}/P_K$  was determined by Demontis et al. [19] as approximately 0.3, in agreement with previous

### Current Biology, Volume 18

values from salamander rods [20, 21], we can use this ratio together with the value of  $i_h$  from Eqn. (10), which is equal to the sum of  $I_{h(Na)}$  and  $I_{h(K)}$ , to calculate the values of the sodium and potassium currents individually and to estimate the influx of  $Na^+$  into the inner segment through the  $i_h$  channels as a function of voltage. This was then combined with data in Fig. 2B of our paper to calculate the value of the influx as a function of steady illumination, which was divided by 3 to give the rate of ATP consumption required by the  $Na^+/K^+$  ATPase for removing the  $Na^+$  entering through the  $i_h$  channels.

### Calculation of ATP Consumption from $Ca^{2+}$ Pumping in Inner Segment

To calculate the size of the  $Ca^{2+}$  current and the ATP required to remove entering  $Ca^{2+}$  as a function of steady light intensity, we began with the voltage-clamp measurements of Morgans et al. [22] from mouse rods. They give the value of the Ca current from the chord conductance equation as

$$I_{Ca} = G_{Ca}(V - E_r) \quad (12)$$

where  $I_{Ca}$  is the calcium current,  $G_{Ca}$  the calcium conductance,  $V$  the voltage, and  $E_r$  the reversal potential of the calcium current (approximately +1 mV). They showed that the voltage dependence of  $G_{Ca}$  could be adequately described by a Boltzmann equation of the form

$$G_{Ca} = \frac{G_{max}}{1 + \exp\left[\frac{-(V - V_{0.5})}{k_{act}}\right]} \quad (13)$$

with mean values of  $G_{max}$ ,  $V_{0.5}$ , and  $k_{act}$  equal to 1.2 nS, -36.5 mV, and 6.1 mV. This gives a value for the inward Ca current at a dark resting membrane potential of -37.3 mV equal to about 21.5 pA. This value may underestimate the  $Ca^{2+}$  influx, since the low value of the reversal

**Current Biology, Volume 18**

potential of about -1 mV in the experiments of Morgans et al. [22] would suggest that the channels also had a significant permeability to the  $\text{Cs}^+$  included in the internal solution of their patch pipettes, an ion known to be able to permeate  $\text{Ca}^{2+}$  channels [see for example 23]. An outward  $\text{Cs}^+$  current would result in a lower net current and an underestimate of the influx of  $\text{Ca}^{2+}$  as well as an underestimate of the light-dark difference in ATP utilization. Since however neither the relative permeability of the channel to  $\text{Cs}^+$  nor the free- $\text{Ca}^{2+}$  concentration of the synaptic terminal is known, we made no attempt to correct for the  $\text{Ca}^{2+}$  efflux due to  $\text{Cs}^+$  permeation.

The  $\text{Ca}^{2+}$  currents recorded by Morgans et al. [22] were in response to a relatively rapid voltage ramp ( $100 \text{ mV s}^{-1}$ ), but steady changes in membrane voltage are likely to produce some inactivation of the  $\text{Ca}^{2+}$  current entering the rod synaptic terminal. Measurements in salamander [24] indicate that a combination of  $\text{Ca}^{2+}$ -dependent inactivation and depletion of  $\text{Ca}^{2+}$  in the synaptic cleft is likely to reduce the  $\text{Ca}^{2+}$  current by about 50% at voltages near the rod resting membrane potential (47% at -40 mV). The inactivation increases with positive voltage and the amplitude of the  $\text{Ca}^{2+}$  current and therefore decreases as the rod hyperpolarizes during illumination. In mammals, the rod channel is apparently a member of the  $\alpha_{\text{F}}$  calcium channel subtype [22, 25-27], which shows little  $\text{Ca}^{2+}$ -dependent inactivation but a pronounced voltage-dependent inactivation with slow kinetics [26, 28]. The inactivation of expressed  $\alpha_{\text{F}}$  channels also increases with increasing depolarization and would be expected to decline during hyperpolarization. Quantitative measurements of the rate and voltage-dependence of mammalian rod calcium currents have not yet been made under physiological conditions. We therefore followed Rabl and Thoreson [24] and take the steady-state current entering the rod in darkness as



**Current Biology, Volume 18**

approximately half that measured by Morgans et al. [22], or about 11 pA. This gives an inward flux of  $\text{Ca}^{2+}$  in darkness of  $(1.1 \times 10^{-11} \text{ pA})(1.6022 \times 10^{-19} \text{ coul per electronic charge})$ , divided by 2 (for the valence of the  $\text{Ca}^{2+}$  ion), equal to  $3.4 \times 10^7 \text{ Ca}^{2+} \text{ s}^{-1}$ . Since most of the  $\text{Ca}^{2+}$  entering the inner segment is apparently extruded by a  $\text{Ca}^{2+}$  ATPase [29-31], which expends one ATP per  $\text{Ca}^{2+}$  ion pumped [32], the ATP required to maintain the inward  $\text{Ca}^{2+}$  current in darkness is also about  $3.4 \times 10^7 \text{ ATP s}^{-1}$ .

During steady illumination, the rod hyperpolarizes. We again used Eqns. (12) and (13) to calculate the current as a function of voltage. It makes relatively little practical difference in these calculations what assumption we make about the voltage dependence of inactivation, since as the rod hyperpolarizes, the Ca current declines rather precipitously, and the effect of inactivation becomes rather small on the total influx of  $\text{Ca}^{2+}$ . It is nevertheless likely that inactivation decreases with hyperpolarization, and we therefore made the arbitrary assumption that the extent of inactivation is proportional to the amplitude of the  $\text{Ca}^{2+}$  current. A relation of this sort would be more likely to describe inactivation in a salamander rod, where it is apparently  $\text{Ca}^{2+}$  dependent, than in a mammalian rod, where it appears to be primarily voltage dependent. In either case, however, the extent of inactivation would decline with hyperpolarization, and the difference between a dependence on current and a dependence on voltage is likely to be small.

**References**

1. Demontis, G.C., Longoni, B., Gargini, C., and Cervetto, L. (1997). The energetic cost of photoreception in retinal rods of mammals. *Arch Ital Biol* 135, 95-109.
2. Yau, K.W., and Nakatani, K. (1984). Electrogenic Na-Ca exchange in retinal rod outer

**Current Biology, Volume 18**

- segment. *Nature* 311, 661-663.
3. Cervetto, L., Lagnado, L., Perry, R.J., Robinson, D.W., and McNaughton, P.A. (1989). Extrusion of calcium from rod outer segments is driven by both sodium and potassium gradients. *Nature* 337, 740-743.
  4. Cobbs, W.H., and Pugh, E.N., Jr. (1987). Kinetics and components of the flash photocurrent of isolated retinal rods of the larval salamander, *Ambystoma tigrinum*. *J Physiol (Lond)* 394, 529-572.
  5. Nakatani, K., and Yau, K.W. (1988). Calcium and magnesium fluxes across the plasma membrane of the toad rod outer segment. *J Physiol (Lond)* 395, 695-729.
  6. Perry, R.J., and McNaughton, P.A. (1991). Response properties of cones from the retina of the tiger salamander. *J Physiol (Lond)* 433, 561-587.
  7. Makino, C.L., Dodd, R.L., Chen, J., Burns, M.E., Roca, A., Simon, M.I., and Baylor, D.A. (2004). Recoverin regulates light-dependent phosphodiesterase activity in retinal rods. *J Gen Physiol* 123, 729-741.
  8. Schneeweis, D.M., and Schnapf, J.L. (1995). Photovoltage of rods and cones in the macaque retina. *Science* 268, 1053-1056.
  9. Baylor, D.A., and Nunn, B.J. (1986). Electrical properties of the light-sensitive conductance of rods of the salamander *Ambystoma tigrinum*. *J Physiol* 371, 115-145.
  10. Yau, K.W., and Baylor, D.A. (1989). Cyclic GMP-activated conductance of retinal photoreceptor cells. *Annu Rev Neurosci* 12, 289-327.
  11. Garrahan, P.J., and Glynn, I.M. (1967). The stoichiometry of the sodium pump. *J Physiol* 192, 217-235.

**Current Biology, Volume 18**

12. Nickell, S., Park, P.S., Baumeister, W., and Palczewski, K. (2007). Three-dimensional architecture of murine rod outer segments determined by cryoelectron tomography. *J Cell Biol* 177, 917-925.
13. Woodruff, M.L., Olshevskaya, E.V., Savchenko, A.B., Peshenko, I.V., Barrett, R., Bush, R.A., Sieving, P.A., Fain, G.L., and Dizhoor, A.M. (2007). Constitutive excitation by Gly90Asp rhodopsin rescues rods from degeneration caused by elevated production of cGMP in the dark. *Journal of Neuroscience* 27, 8805-8815.
14. Makino, C.L., Peshenko, I.V., Wen, X.-H., Olshevskaya, E.V., Barrett, R., and Dizhoor, A.M. (2008). A role for GCAP2 in regulating the photoresponse: guanylyl cyclase activation and rod electrophysiology. *J. Biol. Chem.* 283, 29135-29143.
15. Jeon, C.-J., Strettoi, E., and Masland, R.H. (1998). The Major Cell Populations of the Mouse Retina. *Journal of Neuroscience* 18, 8936-8946.
16. Olshevskaya, E.V., Calvert, P.D., Woodruff, M.L., Peshenko, I.V., Savchenko, A.B., Makino, C.L., Ho, Y.S., Fain, G.L., and Dizhoor, A.M. (2004). The Y99C mutation in guanylyl cyclase-activating protein 1 increases intracellular Ca<sup>2+</sup> and causes photoreceptor degeneration in transgenic mice. *J Neurosci* 24, 6078-6085.
17. Matthews, H.R., and Fain, G.L. (2003). The effect of light on outer segment calcium in salamander rods. *J Physiol* 552, 763-776.
18. Woodruff, M.L., Janisch, K.M., Peshenko, I.V., Dizhoor, A.M., Tsang, S.H., and Fain, G.L. (2008). Modulation of PDE turnoff during background illumination in mouse rod photoreceptors. *J Neurosci* 28, 2064-2074.
19. Demontis, G.C., Longoni, B., Barcaro, U., and Cervetto, L. (1999). Properties and

**Current Biology, Volume 18**

- functional roles of hyperpolarization-gated currents in guinea-pig retinal rods. *Journal of Physiology* 515, 813-828.
20. Hestrin, S. (1987). The properties and function of inward rectification in rod photoreceptors of the tiger salamander. *Journal of Physiology* 390, 319-333.
  21. Wollmuth, L.P., and Hille, B. (1992). Ionic selectivity of  $I_h$  channels of rod photoreceptors in tiger salamanders. *Journal of General Physiology* 100, 749-765.
  22. Morgans, C.W., Bayley, P.R., Oesch, N.W., Ren, G., Akileswaran, L., and Taylor, W.R. (2005). Photoreceptor calcium channels: insight from night blindness. *Visual Neuroscience* 22, 561-568.
  23. Boland, L.M., and Bean, B.P. (1993). Modulation of N-type calcium channels in bullfrog sympathetic neurons by luteinizing hormone-releasing hormone: kinetics and voltage dependence. *Journal of Neuroscience* 13, 516-533.
  24. Rabl, K., and Thoreson, W.B. (2002). Calcium-dependent inactivation and depletion of synaptic cleft calcium ions combine to regulate rod calcium currents under physiological conditions. *European Journal of Neuroscience* 16, 2070-2077.
  25. Morgans, C.W. (2001). Localization of the alpha 1F calcium channel subunit in the rat retina. *Investigative Ophthalmology and Visual Science* 42, 2414-2418.
  26. McRory, J.E., Hamid, J., Doering, C.J., Garcia, E., Parker, R., Hamming, K., Chen, L., Hildebrand, M., Beedle, A.M., Feldcamp, L., Zamponi, G.W., and Snutch, T.P. (2004). The CACNA1F gene encodes an L-type calcium channel with unique biophysical properties and tissue distribution. *Journal of Neuroscience* 24, 1707-1718.
  27. Hoda, J.-C., Zaghetto, F., Koschak, A., and Striessnig, J. (2005). Congenital stationary

**Current Biology, Volume 18**

- night blindness type 2 mutations S229P, G369D, L1068P, and W1440X alter channel gating or functional expression of Cav1.4 L-type Ca<sup>2+</sup> channels. *Journal of Neuroscience* 25, 252-259.
28. Koschak, A., Reimer, D., Walter, D., Hoda, J.-C., Heinzle, T., Grabner, M., and Striessnig, J. (2003). Cav1.4a1 subunits can form slowly inactivating dihydropyridine-sensitive L-type Ca<sup>2+</sup> channels lacking Ca<sup>2+</sup>-dependent inactivation. *Journal of Neuroscience* 23, 6041-6049.
29. Krizaj, D., and Copenhagen, D.R. (1998). Compartmentalization of calcium extrusion mechanisms in the outer and inner segments of photoreceptors. *Neuron* 21, 249-256.
30. Morgans, C.W., El Far, O., Berntson, A., Wassle, H., and Taylor, W.R. (1998). Calcium extrusion from mammalian photoreceptor terminals. *J Neurosci* 18, 2467-2474.
31. Cia, D., Bordais, A., Varela, C., Forster, V., Sahel, J.A., Rendon, A., and Picaud, S. (2005). Voltage-gated channels and calcium homeostasis in mammalian rod photoreceptors. *Journal of Neurophysiology* 93, 1468-1475.
32. Niggli, V., Adunyah, E., Penniston, J., and Carafoli, E. (1981). Purified (Ca<sup>2+</sup>-Mg<sup>2+</sup>)-ATPase of the erythrocyte membrane. Reconstitution and effect of calmodulin and phospholipids. *Journal of Biological Chemistry* 256, 395-401.
